# Supplementary material for: Grain size dynamics using a new planform model – Part 1: GravelScape description and validation
Source: Copernicus journal article supplement (doi:10.5194/esurf-13-875-2025), 2025-09-15
Supplement: Supplementary file 1 [file esurf-13-875-2025-supplement.pdf]

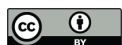

*Supplement of*

## **Grain size dynamics using a new planform model – Part 1: GravelScape description and validation**

**Amanda Lily Wild et al.**

*Correspondence to:* Amanda Lily Wild ([awild@gfz-potsdam.de](mailto:awild@gfz-potsdam.de))

The copyright of individual parts of the supplement might differ from the article licence.

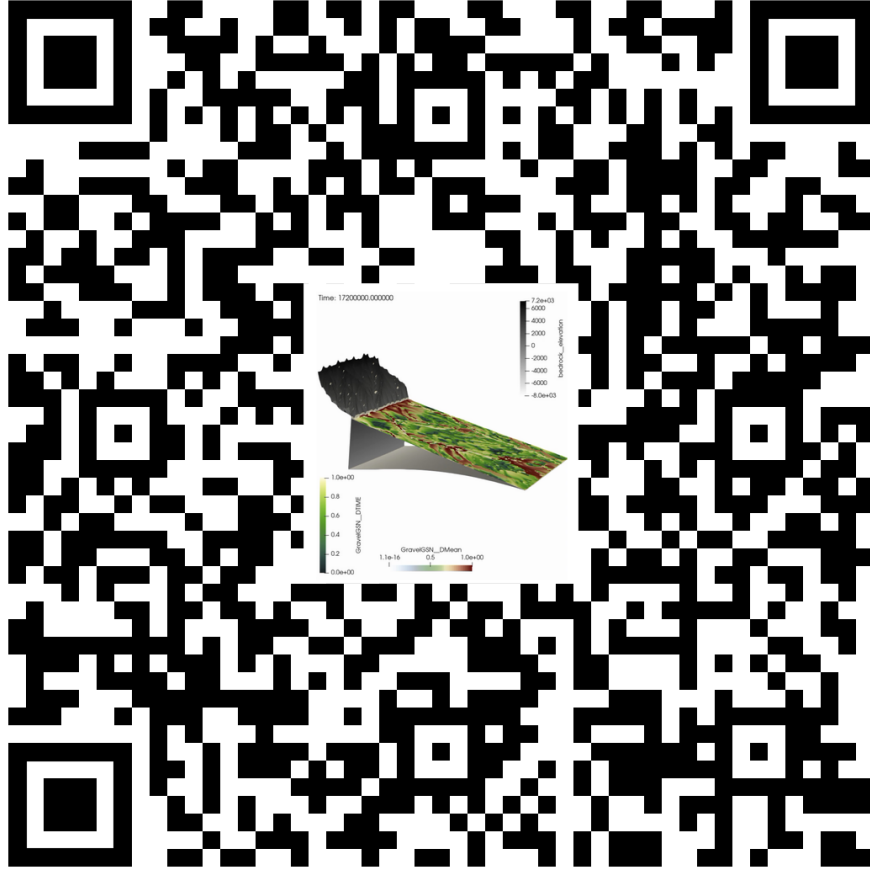

**Figure S1:** Please scan the QR code to play the following video of GravelScape surface grain size fining for 5Myrs at steady-state.

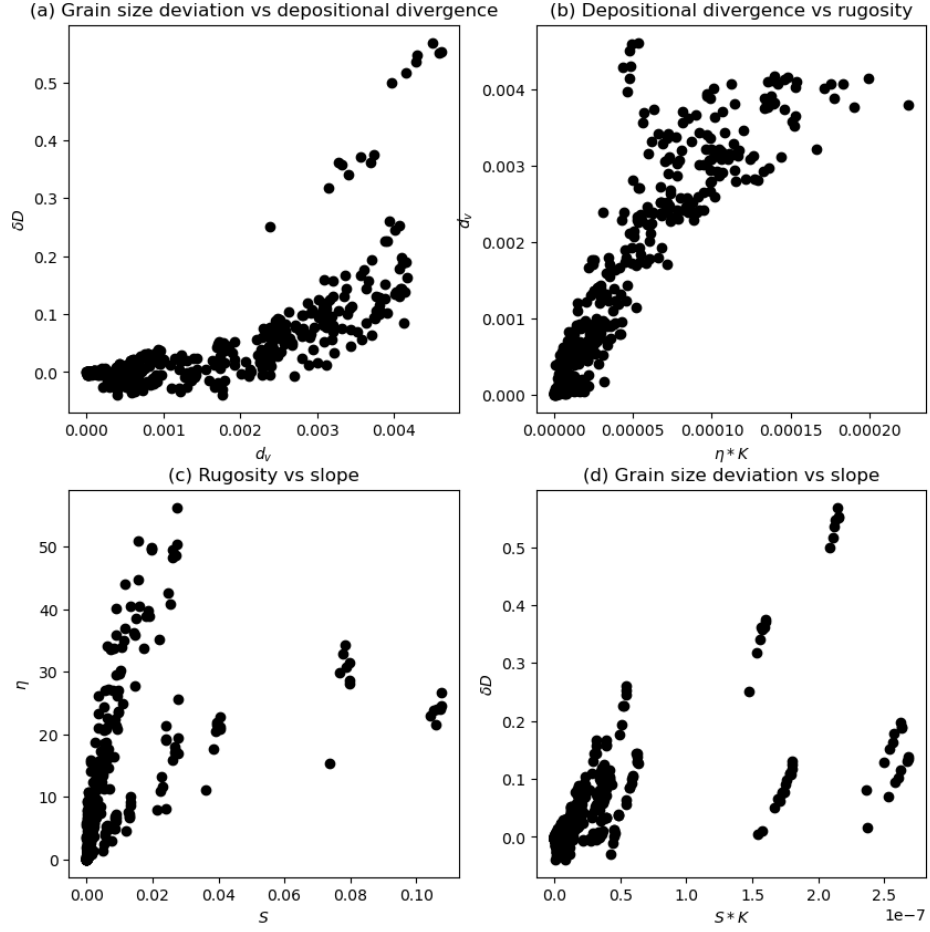

*Figure S2: Correlations when not in log space.*

Changing  $\beta$  through orogen precipitation

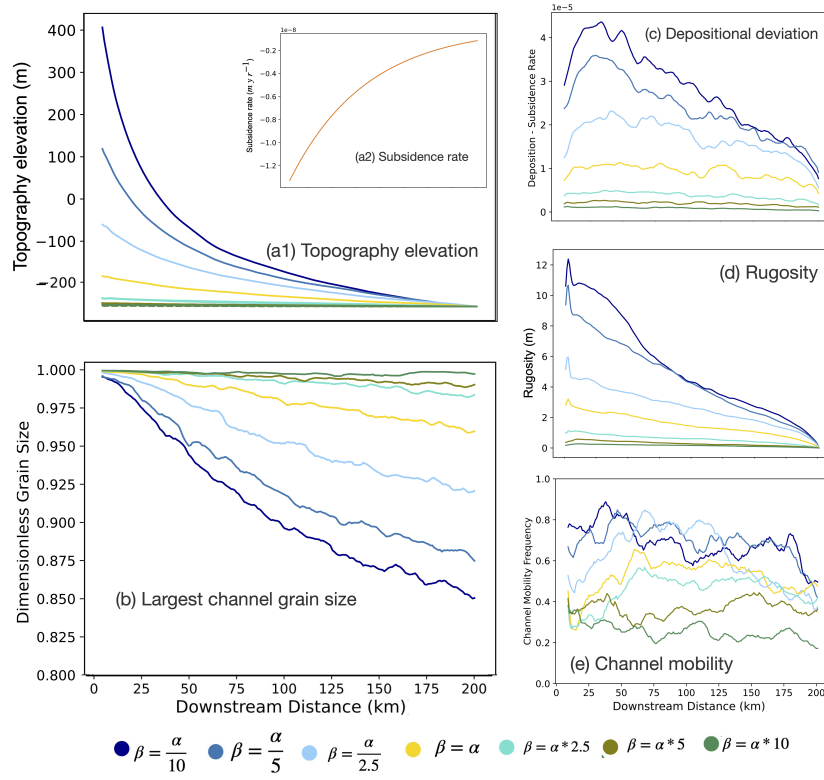

**Figure S3:** Changing  $\beta$  with downstream distance preserved for topography (a1), underlying subsidence rate (a2), largest channel grain size (b), depositional deviation (c), rugosity (d), and channel mobility (e).

Changing  $F$  through imposed basin subsidence

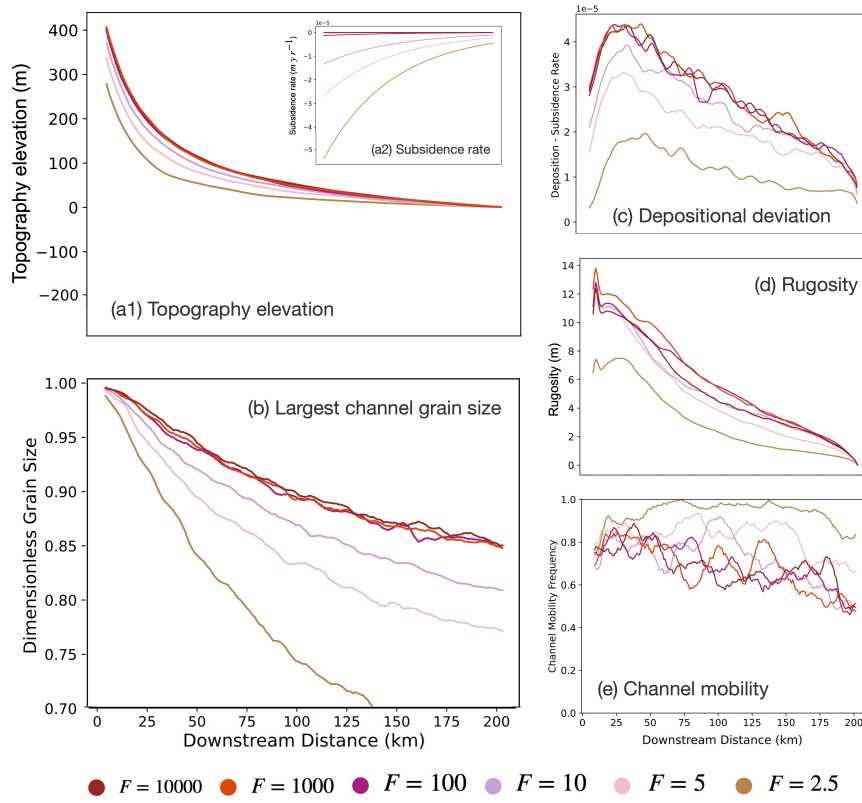

**Figure S4:** Changing  $F$  with downstream distance preserved for topography (a1), underlying subsidence rate (a2), largest channel grain size (b), depositional deviation (c), rugosity (d), and channel mobility (e).
